# Supplementary material
Source: publisher figshare collection journal article supplement (https://gsajournals.figshare.com/articles/dataset/_/13650392)
Supplement: Supplementary file 1 [file 1]

**Table S2** qPCR primers used in this study.

| Primer name | Sequence (5'→3')       | Gene name   | Systematic name |
|-------------|------------------------|-------------|-----------------|
| IM-q155     | TTCCCAACAACATCCAGACC   | <i>tubA</i> | AFUB_010330     |
| IM-q156     | CGACGGAACATAGCAGTGAA   |             |                 |
| IM-q79      | GACCCCTCGAAGACCTTTGTC  | <i>sebA</i> | AFUB_066180     |
| IM-q80      | CCTGACGGCGGAAACG       |             |                 |
| IM-q71      | TGCAAAGAACCTGGCTGCAA   | <i>brlA</i> | AFUB_015960     |
| IM-q72      | AACCCAGCAGACATGAGGCTT  |             |                 |
| IM-q89      | GCCAGACGTTAACAACGAACAG | <i>fmqA</i> | AFUB_078070     |
| IM-q90      | GACAAACTGGGACCTCCAGAAC |             |                 |
| IM-q91      | AGGGAGGCAGTCAGGCAAT    | <i>fmqB</i> | AFUB_078050     |
| IM-q92      | GCCAATTTCGAGCGCTGTAG   |             |                 |
| IM-q93      | CCCGATCTCATCCAGACCAA   | <i>fmqC</i> | AFUB_078040     |
| IM-q94      | TGGAGCCAAAACCATCTTTACA |             |                 |
| IM-q95      | TTTTCGAAGCGACGAGCAA    | <i>fmqD</i> | AFUB_047560     |
| IM-q96      | CGAAGATGGCGGCGATAT     |             |                 |
| IM-q97      | GGCACACGGAAAGCATGATA   | <i>fmqE</i> | AFUB_078030     |
| IM-q98      | TCGGAAGTGGCGTGTAAGC    |             |                 |
