# Supplementary material
Source: publisher figshare collection journal article supplement (https://gsajournals.figshare.com/articles/dataset/_/13650392)
Supplement: Supplementary file 2 [file 1]

**A. <sup>1</sup>H NMR analysis of Fumiquinazoline C (FqC).** <sup>1</sup>H NMR (600MHz, CDCl<sub>3</sub>)  
δ ppm: 8.37 (1H, dd, *J*=8.0 and 1.5 Hz, H-10); 7.86 (1H, t, *J*=8.0 Hz, H-8); 7.81 (1H, dd, *J*= 8.0 and 1.5 Hz, H-7); 7.63 (1H, t, *J*= 8.0 Hz, H-9); 7.46 (1H, d, *J*=7.8 Hz, H-24); 7.35 (1H, d, *J*= 7.8Hz, H-27); 7.32 (1H, t, *J*= 7.8 Hz, H-25); 7.20 (1H, t, *J*=7.8Hz, H-26); 6.72 (1H, brs, H-2); 5.74 (1H, d, *J*=8.3 Hz, H-14); 5.34 (1H, d, *J*=7.3 Hz, H-18); 3.76-3.65 (1H, m, H-20); 2.98 (1H, dd, *J*= 15.1 and 7.4 Hz, H-15a); 2.14 (1H, d, *J*= 15.1 Hz, H-15b); 2.06 (3H, s, H-16); 1.07 (3H, d, *J*=6.8 Hz, H-29); 1.03 (1H, t, *J*= 7.8 Hz, H-19).

**B. <sup>1</sup>H NMR analysis of Fumiquinazoline D (FqD):** <sup>1</sup>H NMR (600MHz, CDCl<sub>3</sub>)  
δ ppm: 8.25 (1H, dd, *J*=7.8 and 1.5 Hz, H-10); 7.80 (1H, t, *J*=7.8 Hz, H-8); 7.71 (1H, d, *J*= 7.8 and 1.5 Hz, H-7); 7.54 (1H, d, *J*= 7.8, H-9); 7.41 (1H, d, *J*=7.8 Hz, H-24); 7.36 (1H, d, *J*= 7.8Hz, H-27); 7.38-7.33 (1H, m, H-25); 7.23-7.19 (1H, m, H-26); 5.85 (1H, brs, H-2); 5.73-5.68 (1H, m, H-14); 5.35 (1H, s, H-18); 3.74-3.66 (1H, m, H-20); 3.00 (1H, dd, *J*= 15.2 and 7.6 Hz, H-15a); 2.07 (1H, d, *J*= 15.1 Hz, H-15b); 1.28 (3H, s, H-16); 1.19 (3H, d, *J*=6.5 Hz, H-29); 1.03 (1H, t, *J*= 7.7 Hz, H-19).
