# Supplementary material
Source: publisher figshare collection journal article supplement (https://gsajournals.figshare.com/articles/dataset/_/13650392)
Supplement: Supplementary file 3 [file 1]

**Table S3** Primers used in this study for ChIP-qPCR experiments.

| Primer name           | Sequence (5'→3')         | Systematic name             | Promoter motif localization |
|-----------------------|--------------------------|-----------------------------|-----------------------------|
| <b>RlmA::GFP ChIP</b> |                          |                             |                             |
| IM-ChIP41             | GGAGCCATCCGCATGGT        | <i>fmqA</i>                 | -935                        |
| IM-ChIP42             | TTTATACTCTACCCAGCTAAA    | <i>fmqA</i>                 | -935                        |
| IM-ChIP43             | ATTTGCCTCAGTGACACTAA     | <i>fmqA</i>                 | -83                         |
| IM-ChIP44             | CGCAAGGATCGTTGCACACCC    | <i>fmqA</i>                 | -83                         |
| IM-ChIP45             | TTACCCCTTGCTGTTTAATAGGAC | <i>fmqB</i>                 | -634                        |
| IM-ChIP46             | AGAGAGCTCTGGCACGTCTT     | <i>fmqB</i>                 | -634                        |
| IM-ChIP47             | GTGAGGAGGTAAGAGGTGCG     | <i>fmqC</i>                 | -351                        |
| IM-ChIP48             | ATCGAGAATGTTTCAATGTGCC   | <i>fmqC</i>                 | -351                        |
| IM-ChIP49             | GTAAGAGAGCTCTGGCACGTC    | <i>fmqD</i>                 | -202                        |
| IM-ChIP50             | CCCCTTGCTGTTTAATAGGAC    | <i>fmqD</i>                 | -202                        |
| <b>SebA::GFP ChIP</b> |                          |                             |                             |
| IM-ChIP55             | CATGTGCGGGCCCAAT         | <i>fmqA</i>                 | -1759                       |
| IM-ChIP56             | TTGCACCCCCTTCAGCTATAA    | <i>fmqA</i>                 | -1759                       |
| IM-ChIP57             | GAAAGGTCTCATTATCGGCATT   | <i>fmqA</i>                 | -2248                       |
| IM-ChIP58             | GACTGCGGAATTGGCGAAGATTGA | <i>fmqA</i>                 | -2248                       |
| IM-ChIP59             | CCTGGAATCGATCCATAAATGG   | <i>fmqB</i>                 | -2421                       |
| IM-ChIP60             | ACTGCAGAACTTTCTCGTGG     | <i>fmqB</i>                 | -2421                       |
| IM-ChIP61             | TACCAAGCGAGCGGACACA      | <i>fmqB</i>                 | -1516                       |
| IM-ChIP62             | AACACCATCGGCCCTACGCTTG   | <i>fmqB</i>                 | -1516                       |
| IM-ChIP63             | AGGACGGGTCGTTGAATGTC     | <i>fmqB</i>                 | -982                        |
| IM-ChIP64             | TCGGTCCGGTCTTGACACCAGA   | <i>fmqB</i>                 | -982                        |
| IM-ChIP75             | CGCTTCGAAAAGGGACTTTG     | <i>fmqB</i>                 | -844                        |
| IM-ChIP76             | TGAGATCAGCCATGCAGTACAT   | <i>fmqB</i>                 | -844                        |
| IM-ChIP77             | TGTCACCTCGCCATCCTTTCTATC | <i>fmqC</i>                 | -2578                       |
| IM-ChIP78             | CGTCTTGCCGACTAATAACATG   | <i>fmqC</i>                 | -2578                       |
| IM-ChIP79             | AAACTCCGTGGTGCTCTCCTGCA  | <i>fmqC</i>                 | -2363                       |
| IM-ChIP80             | ATGAAGGCGCGCACGATTCC     | <i>fmqC</i>                 | -2363                       |
| IM-ChIP83             | AACATGTCTCTAGATCCTATC    | <i>fmqB/</i><br><i>fmqD</i> | -433<br>-400                |
| IM-ChIP84             | GGGTCGTCTCACGAATCGCAC    | <i>fmqB/</i><br><i>fmqD</i> | -433<br>-400                |

|            |                          |                              |              |
|------------|--------------------------|------------------------------|--------------|
| IM-ChIP85  | TGTATTATTAGGATTCTATTTTC  | <i>fmqB</i> /<br><i>fmqD</i> | -686<br>-147 |
| IM-ChIP86  | GCCAAGTGACATAGCAAATGTC   | <i>fmqB</i> /<br><i>fmqD</i> | -686<br>-147 |
| IM-ChIP121 | CTGTCAAGCAAGGGCTGAGA     | <i>fmqA</i>                  | -810         |
| IM-ChIP122 | CATGTATGTACCTTCGATCAGTTT | <i>fmqA</i>                  | -810         |
| IM-ChIP123 | CCAGATTTTGCCTTTAGAGC     | <i>fmqA</i>                  | -1390        |
| IM-ChIP124 | TTCCTCAAGCAGTTCTTGCG     | <i>fmqA</i>                  | -1390        |
| IM-ChIP125 | GTCGAGGACCGTTTTTCACAT    | <i>fmqA</i>                  | -2444        |
| IM-ChIP126 | GTATTCTGACTTGCTCGAGGGAG  | <i>fmqA</i>                  | -2444        |
| IM-ChIP127 | TTCCATTGGACCGAGGGCT      | <i>fmqB</i>                  | -1865        |
| IM-ChIP128 | CCCGGGGATGTCTGGGG        | <i>fmqB</i>                  | -1865        |
| IM-ChIP129 | TGGGATGCGCAACAGGATG      | <i>fmqC</i>                  | -40          |
| IM-ChIP130 | GATCAAGTGTCGTTGTCTCCG    | <i>fmqC</i>                  | -40          |
| IM-ChIP131 | CTATTTGCCCTCAACAAGCAT    | <i>fmqC</i>                  | -461         |
| IM-ChIP48  | ATCGAGAATGTTTCAATGTGCC   | <i>fmqC</i>                  | -461         |
