# Supplementary material
Source: publisher figshare collection journal article supplement (https://gsajournals.figshare.com/articles/dataset/_/13650392)
Supplement: Supplementary file 5 [file 1]

**Table S1** Primers used in this study for construction of mutant strains.

| Primer name*    | Sequence (5'→3')                                     |
|-----------------|------------------------------------------------------|
| fmqA1           | GCTGTAATACGACTCACTATAGGGAATATTCACACGCAGAGGAACCGTGG   |
| fmqA2           | GCCTGAGTGGCCATCGAATTCCTGCAGCCCCGAACCTCCATCTGCCGCC    |
| fmqA3           | GGGGGGGGCCCGGTACCCAGCTTTTGTTCCTCAATTATAGGATCAGGACTCG |
| fmqA4           | CATAACTAATTACATGATGCGGCCCTCTAGGACCCCTTATTCGGTAGCC    |
| fmqAc FW        | TCCCTTTATTGTTGGAGTACTAGACC                           |
| fmqAc REV       | GAACAGTAGAGCTCTCTTTCAGGC                             |
| ptrA-for2       | GGGCTGCAGGAATTCGATGG                                 |
| ptrA-rev3       | TACTCAGCACACTCGCGCTG                                 |
| gpdA_FW_VV      | CTTGTTGAATTTAGAACGTGG                                |
| hgroSTOP_RE_VV  | CTATTCCTTTGCCCTCGGA                                  |
| mpkA 5' ORF FW  | CGGCTACACACGACACTC                                   |
| mpkA 3' REV     | GACTGTCGCAGAAATCCGCTT                                |
| mpkA 5F         | CTCATTCCTTGTTCTGATGCG                                |
| mpkA 600 ups    | GAGCCCTGACTTCACTGCA                                  |
| linker 3×HA REV | CTGTCTGAGAGGAGGCACTGA                                |

\* For primers location refer to Figures S1 and S2.
